# Supplementary material for: Coarse-Grained/Molecular Mechanics of the TAS2R38 Bitter Taste Receptor: Experimentally-Validated Detailed Structural Prediction of Agonist Binding
Source: PLoS One. 2013 May 31;8(5):e64675. doi: 10.1371/journal.pone.0064675 (PMC3669430; doi:10.1371/journal.pone.0064675)
Supplement: Text S1 — Supporting information. Ligand binding cavity volume calculations (calculated using the program FPocket [42], [43]). Molecular docking results (DOC) [file pone.0064675.s007.doc]

**SUPPORTING INFORMATION**

**Coarse-Grained/Molecular Mechanics of the TAS2R38 Bitter Taste Receptor: Experimentally-Validated Detailed Structural Prediction of Agonist Binding**

**AUTHORS**

Alessandro Marchiori1,3,6,†, Luciana Capece2,3,6,†, Alejandro Giorgetti3,4,†, Paolo Gasparini5, Maik Behrens6, Paolo Carloni3,7,* and Wolfgang Meyerhof6

1International school for advanced studies (SISSA-ISAS), Neuroscience sector, via Bonomea 265, Trieste, Italy. 2International Centre for Genetic Engineering and Biotechnology, Trieste, Italy.3 Computational Biophysics, German Research School for Simulation Sciences, D-52425 Juelich, Germany. 4Dept of Biotechnology, University of Verona, Verona, Italy. 5 Institute for Maternal and Child Health - IRCCS “Burlo Garofolo”,Trieste, Italy. 6 Department of Molecular Genetics, German Institute of Human Nutrition Potsdam-Rehbruecke (DIfE), D-14558 Nuthetal, Germany. 6Institute for Advanced Simulation IAS-5, Computational Biomedicine, Forschungszentrum Juelich, D-52425 Juelich, Germany.

*To whom correspondence should be addressed.

**†These authors contributed equally.**

***1. Ligand binding cavity volume calculations****.* We calculated the volume of the ligand binding cavity for **A** and **B** using the FPocket online module [1, 2]. We obtained a total of 27 cavities for the model **A** and 28 cavities for model **B**. The larger cavities for both models were those corresponding to the ligand binding pocket. They have a volume of 1842 Å3 and 2929 Å3 for models **A** and **B**, respectively. The volume of the cavities of all the GPCRs with known structures range from 756 Å3 for the rhodopsin (1U19) to 2831 Å3 of β2 adrenergic receptor (1RH1) as calculated with FPocket [1, 2]. Interestingly, while the cavity of model **B** is solvent accessible that of model **A** is not (Fig. S3). However, agonists could still enter the cavity in **A** provided that ECL2 experiences structural fluctuations.

***2. Molecular docking results****.* The most populated clusters of PTC/**A**, PTC/**B,** PROP/**A,** PROB/**B** are formed by 120, 100, 80, 90 structures out of 200, respectively. They are those considered to MM/CG simulations.

In PTC/**A**, the agonist forms hydrophobic interactions with Phe197 ring. PTC sulphur atom form an H-bond with Ser260-OH group. In PTC/**B,** the agonist forms hydrophobic interactions with Phe197, Trp201, Trp99, Phe264. It also forms the same H-bond as PTC/**A**. In PROP/**A** the agonist sulphur atom forms an H-bond with the side-chain of Asn103. The NH group adjacent to the sulphur side-chain (Chart I main text) forms an H-bond with the carbonyl group of Asn103. The second NH group of the agonist forms an H-bond with Ser260 hydroxyl group. In PROP/**B**, the agonist's aromatic oxygen atom forms an H-bond with Asn103 side-chain amino group. Its NH group forms an H-bond with Asn103 side-chain carbonyl group. The agonist sulphur atom forms an H-bond with Gln104 side-chain.

**REFERENCES**

1. Schmidtke P, Le Guilloux V, Maupetit J, Tuffery P (2010) fpocket: online tools for protein ensemble pocket detection and tracking. Nucleic Acids Res 38: W582-589.

2. Le Guilloux V, Schmidtke P, Tuffery P (2009) Fpocket: an open source platform for ligand pocket detection. BMC Bioinformatics 10: 168.
